# Supplementary material for: NLS-tagging: an alternative strategy to tag nuclear proteins
Source: PubMed Central journal article supplement (PMC4245968; doi:10.1093/nar/gku869), 2014-09-26
Supplement: supp_gku869_nar-02091-met-g-2014-File008.pdf [file supp_gku869_nar-02091-met-g-2014-File008.pdf]

**Supplementary Table 1: List of Fli-1 interacting proteins in MEL cells**

Table depicting all the proteins interacting with Fli-1 in MEL cells and whose Mascott Score is at least 80 and two fold higher in 3xFlag-Bio(NLS)-Fli-1 than in MEL BirA cells.

**Supplementary Table 2: Primers for plasmid construction**

Primers used to amplify the different cDNA coding parts of 3xFlag-Bio(NLS)-Fli-1 and 3xFlag-Bio(NLS)-Irf2bp2 proteins

**Supplementary Table 3: Primers used for RT-qPCR**

**Supplementary Table 4: Primers used for ChIP-qPCR**

**Supplementary Table 1 : List of Fli-1 interacting proteins in MEL cells**

| <b>Protein</b>       | <b>Unique Peptide 3xFlag-Bio(NLS)-Fli-1 cells</b> | <b>Unique Peptide MEL- BirA cells</b> | <b>Mascot score 3xFlag-Bio(NLS)-Fli-1 cells</b> | <b>Mascot score MEL-BirA cells</b> |
|----------------------|---------------------------------------------------|---------------------------------------|-------------------------------------------------|------------------------------------|
| <b>Parp1</b>         | 31                                                |                                       | 1608                                            |                                    |
| <b>Etv6</b>          | 18                                                |                                       | 1008                                            |                                    |
| <b>C130039O16Rik</b> | 14                                                |                                       | 841                                             |                                    |
| <b>Trrap</b>         | 19                                                |                                       | 814                                             |                                    |
| <b>Pfkl</b>          | 12                                                | 3                                     | 662                                             | 176                                |
| <b>Xrcc6</b>         | 11                                                |                                       | 596                                             |                                    |
| <b>Runx1</b>         | 10                                                |                                       | 547                                             |                                    |
| <b>Dek</b>           | 8                                                 | 2                                     | 526                                             | 103                                |
| <b>Gata1</b>         | 7                                                 | 4                                     | 464                                             | 210                                |
| <b>Vrk3</b>          | 8                                                 |                                       | 439                                             |                                    |
| <b>Fermt3</b>        | 10                                                | 6                                     | 426                                             | 207                                |
| <b>Dido1</b>         | 8                                                 |                                       | 415                                             |                                    |
| <b>Dnmt1</b>         | 7                                                 | 3                                     | 352                                             | 147                                |
| <b>Pfkp</b>          | 6                                                 |                                       | 343                                             |                                    |
| <b>Plk1</b>          | 8                                                 |                                       | 342                                             |                                    |
| <b>Racgap1</b>       | 8                                                 |                                       | 342                                             |                                    |
| <b>Dnttip1</b>       | 7                                                 |                                       | 317                                             |                                    |
| <b>Snw1</b>          | 6                                                 | 3                                     | 307                                             | 100                                |
| <b>Tal1</b>          | 6                                                 |                                       | 301                                             |                                    |
| <b>Tada3</b>         | 5                                                 |                                       | 261                                             |                                    |
| <b>Wiz</b>           | 6                                                 |                                       | 252                                             |                                    |
| <b>Abcf2</b>         | 7                                                 |                                       | 241                                             |                                    |
| <b>Mta2</b>          | 4                                                 | 2                                     | 239                                             | 95                                 |
| <b>Ldb1</b>          | 5                                                 |                                       | 238                                             |                                    |
| <b>Nfix</b>          | 5                                                 |                                       | 237                                             |                                    |
| <b>Ptbp1</b>         | 5                                                 | 2                                     | 236                                             | 95                                 |
| <b>Xrcc1</b>         | 4                                                 |                                       | 213                                             |                                    |
| <b>Khdrbs1</b>       | 4                                                 | 2                                     | 212                                             | 85                                 |
| <b>Copb1</b>         | 5                                                 |                                       | 203                                             |                                    |
| <b>Tfeb</b>          | 5                                                 |                                       | 190                                             |                                    |
| <b>Ikzf1</b>         | 3                                                 |                                       | 188                                             |                                    |

| <b>Protein</b> | <b>Unique Peptide<br/>3xFlag-<br/>Bio(NLS)-Fli-<br/>1 cells</b> | <b>Unique Peptide<br/>MEL- BirA<br/>cells</b> | <b>Mascot<br/>score<br/>3xFlag-<br/>Bio(NLS)-Fli-<br/>1 cells</b> | <b>Mascott<br/>score<br/>MEL-BirA<br/>cells</b> |
|----------------|-----------------------------------------------------------------|-----------------------------------------------|-------------------------------------------------------------------|-------------------------------------------------|
| Eif4a3         | 4                                                               |                                               | 185                                                               |                                                 |
| Pfkm           | 4                                                               | 2                                             | 185                                                               | 70                                              |
| Parp2          | 3                                                               |                                               | 184                                                               |                                                 |
| Rbm17          | 4                                                               | 1                                             | 178                                                               | 52                                              |
| Cpsf7          | 4                                                               | 2                                             | 174                                                               | 72                                              |
| Znf710         | 3                                                               |                                               | 166                                                               |                                                 |
| Vrk1           | 3                                                               |                                               | 164                                                               |                                                 |
| Hdac2          | 3                                                               |                                               | 159                                                               |                                                 |
| Taf6l          | 3                                                               |                                               | 159                                                               |                                                 |
| Msh6           | 4                                                               |                                               | 158                                                               |                                                 |
| Mta3           | 3                                                               |                                               | 156                                                               |                                                 |
| Dnajc9         | 3                                                               |                                               | 152                                                               |                                                 |
| Smarca4        | 3                                                               | 1                                             | 152                                                               | 47                                              |
| Cbfb           | 3                                                               |                                               | 151                                                               |                                                 |
| Taf5l          | 3                                                               |                                               | 139                                                               |                                                 |
| Aplf           | 2                                                               |                                               | 139                                                               |                                                 |
| Fxr1           | 3                                                               |                                               | 131                                                               |                                                 |
| Rbm27          | 3                                                               |                                               | 130                                                               |                                                 |
| Serbp1         | 2                                                               |                                               | 127                                                               |                                                 |
| Bcor           | 2                                                               |                                               | 126                                                               |                                                 |
| Tfe3           | 3                                                               |                                               | 125                                                               |                                                 |
| Mtss1          | 3                                                               |                                               | 123                                                               |                                                 |
| Banf1          | 2                                                               |                                               | 123                                                               |                                                 |
| Hltf           | 2                                                               |                                               | 123                                                               |                                                 |
| Baz1a          | 3                                                               |                                               | 120                                                               |                                                 |
| Luc7l3         | 2                                                               |                                               | 116                                                               |                                                 |
| Rcor1          | 3                                                               |                                               | 115                                                               |                                                 |
| Hmmr           | 2                                                               |                                               | 114                                                               |                                                 |
| Gfi1b          | 3                                                               |                                               | 113                                                               |                                                 |
| Rbm25          | 3                                                               |                                               | 112                                                               |                                                 |
| Cdk9           | 3                                                               |                                               | 111                                                               |                                                 |
| Bcas2          | 3                                                               | 1                                             | 109                                                               | 45                                              |
| Ints1          | 2                                                               |                                               | 108                                                               |                                                 |

| <b>Protein</b> | <b>Unique Peptide<br/>3xFlag-<br/>Bio(NLS)-Fli-<br/>1 cells</b> | <b>Unique Peptide<br/>MEL- BirA<br/>cells</b> | <b>Mascot<br/>score<br/>3xFlag-<br/>Bio(NLS)-Fli-<br/>1 cells</b> | <b>Mascot<br/>score<br/>MEL-BirA<br/>cells</b> |
|----------------|-----------------------------------------------------------------|-----------------------------------------------|-------------------------------------------------------------------|------------------------------------------------|
| Xrn2           | 3                                                               |                                               | 107                                                               |                                                |
| Rbm33          | 2                                                               |                                               | 107                                                               |                                                |
| Ehmt2          | 2                                                               |                                               | 104                                                               |                                                |
| Fmr1           | 2                                                               |                                               | 102                                                               |                                                |
| Fxr2           | 2                                                               |                                               | 102                                                               |                                                |
| Rbm15          | 3                                                               |                                               | 101                                                               |                                                |
| Ubtf           | 3                                                               |                                               | 100                                                               |                                                |
| Tada1          | 2                                                               |                                               | 96                                                                |                                                |
| Prpf40a        | 2                                                               |                                               | 95                                                                |                                                |
| Psip1          | 2                                                               |                                               | 95                                                                |                                                |
| Smap2          | 3                                                               |                                               | 94                                                                |                                                |
| Tcf3           | 3                                                               |                                               | 94                                                                |                                                |
| Copg2          | 2                                                               |                                               | 94                                                                |                                                |
| Cbx3           | 2                                                               |                                               | 93                                                                |                                                |
| Pds5a          | 2                                                               |                                               | 93                                                                |                                                |
| Nfic           | 2                                                               |                                               | 91                                                                |                                                |
| Polb           | 2                                                               |                                               | 91                                                                |                                                |
| Ssrp1          | 2                                                               |                                               | 88                                                                |                                                |
| Cdk1           | 2                                                               |                                               | 87                                                                |                                                |
| Pogz           | 2                                                               |                                               | 86                                                                |                                                |
| Wdr82          | 2                                                               |                                               | 85                                                                |                                                |
| Zeb2           | 2                                                               |                                               | 85                                                                |                                                |
| Ubap2l         | 2                                                               |                                               | 84                                                                |                                                |
| Ssbp2          | 1                                                               |                                               | 84                                                                |                                                |
| Ssbp3          | 1                                                               |                                               | 84                                                                |                                                |
| Ssbp4          | 1                                                               |                                               | 84                                                                |                                                |
| Srsf10         | 2                                                               |                                               | 83                                                                |                                                |
| Srsf12         | 2                                                               |                                               | 83                                                                |                                                |
| Supt7l         | 1                                                               |                                               | 82                                                                |                                                |
| Ehmt1          | 2                                                               |                                               | 81                                                                |                                                |
| Sf1            | 2                                                               |                                               | 80                                                                |                                                |
| 2810422J05Rik  | 1                                                               |                                               | 80                                                                |                                                |

| Protein       | Unique Peptide<br>3xFlag-<br>Bio(NLS)-Fli-<br>1 cells | Unique Peptide<br>MEL- BirA<br>cells | Mascot<br>score<br>3xFlag-<br>Bio(NLS)-Fli-<br>1 cells | Mascot<br>score<br>MEL-BirA<br>cells |
|---------------|-------------------------------------------------------|--------------------------------------|--------------------------------------------------------|--------------------------------------|
| 2810422J05Rik | 1                                                     |                                      | 80                                                     |                                      |
| Taf10         | 1                                                     |                                      | 80                                                     |                                      |
| Uba52         | 1                                                     |                                      | 80                                                     |                                      |

**Supplementary Table 2 : Primers for plasmid constructions**

| Primer name                      | Primer sequence                                                                                        |
|----------------------------------|--------------------------------------------------------------------------------------------------------|
| Sense 3xFlag<br>(IRF2BP2)        | 5'-CGATATCGACTACAAGGATCACGACGAGACTACAAGGATC<br>ACGACATCGACTACCAAGGACGATGACGATAAGCCTAGGA-3'             |
| Antisense<br>3xFlag<br>(IRF2BP2) | 5'-GATCTCCTAGGCTTATCGTCATCGTCCTTGGTAGTCGATGT<br>CGTGATCCTTGTAGTCTCGTCGTGATCCTTGTAGTCGATATCGG<br>TAC-3' |
| Sense 3xFlag<br>(Fli-1)          | 5'-<br>GGCCGCGGTACCGACTACAAGGATCACGACGAGACTACAAGGA<br>TCACGACATCGACTACCAAGGACGATGACGATAAGCTCGAGA-3'    |
| Antisense<br>3xFlag (Fli-1)      | 5'GATCTCTCGAGCTTATCGTCATCGTCCTTGGTAGTCGATGTCTG<br>TGATCCTTGTAGTCTCGTCGTGATCCTTGTAGTCGGTACCGC-3'        |
| Forward N-term<br>Fli-1          | 5'GAGAGAGCGGCCGCATGGACGGGACTATTAAGGAGG-3'                                                              |
| Reverse N-term<br>Fli-1          | 5'-GAGAGAGGTACCTGATCCACTCCTGCTGCG-3'                                                                   |
| Forward C-term<br>Fli-1          | 5'-GAGAGACTCGAGGGAGGAGGACTAAACGACATCTTCGAGG<br>CTCAGAAGATCGAGTGGCATCAGCCAGTGAGAGTCAATGTCA-3'           |
| Reverse C-term<br>Fli-1          | 5'GAGAGAAGATCTCTCAAGGCACGTGGGTGT3'                                                                     |
| Forward N-term<br>IRF2BP2        | 5'-GAGAGAGGTACCATGGCCGCGGCGGTGGCGGT-3'                                                                 |
| Reverse N-term<br>IRF2BP2        | 5'-GAGAGAGATATCTTTAGACCCGTTGGCCCCGT-3'                                                                 |
| Forward C-term<br>IRF2BP2        | 5'-<br>GAGAGACCTAGGGGAGGAGGACTAAACGACATCTTCGAGGCT<br>CAGAAGATCGAGTGGCATGCAGTTGCAAGGACAGCAAG-3'         |
| Reverse C-term<br>IRF2BP2        | 5'-GAGAGAAGATCTTCACGAGTCTCTCCTTCT-3'                                                                   |

**Supplementary Table 3 : Primers RT-qPCR**

| <b>Primer name</b>      | <b>Primer sequence</b>      |
|-------------------------|-----------------------------|
| Forward $\beta$ -globin | 5'- CAGGCTGCTGGTTGTCTA-3'   |
| Reverse $\beta$ -globin | 5'-GAGGCTGTCCAAGTGATTC-3'   |
| Forward sfpi-1          | 5'-AGAGCTATAACCAACGTCCAA-3' |
| Reverse sfpi-1          | 5'-GGAAGTTCTCAAACCTCGTTG-3' |
| Forward Alas-2          | See reference 2             |
| Reverse Alas-2          | See reference 2             |

**Supplementary Table 4 : Primers for ChIP-qPCR**

| <b>Primer name</b>                              | <b>Primer sequence</b>       |
|-------------------------------------------------|------------------------------|
| <b>Forward Nip7 promoter</b>                    | 5'- TCACGGAGAATTAGGCTAGA-3'  |
| <b>Reverse Nip7 promoter</b>                    | 5'-GGTCTCTTCTTCAGTCAAGG-3'   |
| <b>Forward Fli-1 promoter</b>                   | 5'-CGATCGCAAAGTGAAGTC-3'     |
| <b>Reverse Fli-1 promoter</b>                   | 5'-CCTGTGCACGTTTGTGT-3'      |
| <b>Forward Tgfb1 locus</b>                      | 5'-GGTGTGTCAGTAGCTTCTCCAG-3' |
| <b>Reverse Tgfb1 locus</b>                      | 5'-GAAATGGGGTGACATAGAGA-3'   |
| <b>Forward Myb -36 kb enhancer (BS1)</b>        | Stadhouders et al., 2012     |
| <b>Reverse Myb -36 kb enhancer (BS1)</b>        | Stadhouders et al., 2012     |
| <b>Forward Myb -68 kb enhancer (BS5)</b>        | Stadhouders et al., 2012     |
| <b>Reverse Myb -68 kb enhancer (BS5)</b>        | Stadhouders et al., 2012     |
| <b>Forward <math>\beta</math>-amylase locus</b> | 5'-CTCCTTGTACGGGTTGGT-3'     |
| <b>Reverse <math>\beta</math>-amylase locus</b> | 5'-AATGATGTGCACAGCTGAA-3'    |
